# Supplementary material for: Screen-Printed Graphite Electrodes as Low-Cost Devices for Oxygen Gas Detection in Room-Temperature Ionic Liquids
Source: MDPI journal article supplement (doi:10.3390/s17122734), 2017-11-26
Supplement: s1 [file s1]

## Supporting Information for:

# Screen-Printed Graphite Electrodes as Low-Cost Devices for Oxygen Gas Detection in Room-Temperature Ionic Liquids

Junqiao Lee <sup>1</sup>, Ghulam Hussain <sup>1</sup>, Craig E. Banks <sup>2</sup> and Debbie S. Silvester <sup>1,\*</sup>

<sup>1</sup> Curtin Institute for Functional Molecules and Interfaces & Department of Chemistry, Curtin University, GPO Box U1987, Perth, WA 6845, Australia; juniaiko@gmail.com (J.L.); ghulam.hussain1985@gmail.com (G.H.);

<sup>2</sup> Faculty of Science and Engineering, Manchester Metropolitan University, Chester Street, Manchester M1 5GD, UK; C.Banks@mmu.ac.uk

\* Correspondence: d.silvester-dean@curtin.edu.au; Tel.: +61-08-9266-7148; Fax: +61-08-9266-2300

**Table S1.** Contact angle ( $\theta$ ) measurements for six different RTILs (1  $\mu$ L volume) dropcast on a SPGE WE surface and on the SPGE polymer mask. The measured saturated water contents of the RTILs, from O'Mahony et al.<sup>1</sup> are also shown.

|                                           | On SPGE WE      | On SPGE mask    | Saturated H <sub>2</sub> O content |
|-------------------------------------------|-----------------|-----------------|------------------------------------|
| RTIL                                      | $\theta/^\circ$ | $\theta/^\circ$ | / ppm                              |
| [C <sub>6</sub> mim][FAP]                 | 14.5 $\pm$ 0.1  | 3.3 $\pm$ 0.3   | 3,068                              |
| [C <sub>4</sub> mim][NTf <sub>2</sub> ]   | 20.7 $\pm$ 0.2  | 6.5 $\pm$ 0.8   | 5,680                              |
| [C <sub>4</sub> mpyrr][NTf <sub>2</sub> ] | 27.0 $\pm$ 0.5  | 26.0 $\pm$ 0.8  | 11,407                             |
| [C <sub>2</sub> mim][NTf <sub>2</sub> ]   | 26.7 $\pm$ 0.2  | 35.7 $\pm$ 0.4  | 19,940                             |
| [C <sub>4</sub> mim][PF <sub>6</sub> ]    | 34.7 $\pm$ 0.7  | 45.3 $\pm$ 0.6  | 24,194                             |
| [C <sub>4</sub> mim][BF <sub>4</sub> ]    | 45.3 $\pm$ 0.3  | 47.5 $\pm$ 0.3  | miscible                           |

<sup>1</sup> O'Mahony, A.M.; Silvester, D.S.; Aldous, L.; Hardacre, C.; Compton, R.G. *J. Chem. Eng. Data*, 2008, 53(12), 2884-2891.

**Table S2.** Viscosity,  $\eta$ , of the six RTILs used in this study, and peak-to-peak separations ( $\Delta E_p$ ) measured for the oxygen/superoxide redox couple on the SPGE and C-SPE at scan rates of 10, 50, and 100 mV·s<sup>-1</sup> for 100% vol. O<sub>2</sub>.

| On SPGE                                   | $\eta$ §/cP | $\Delta E_p$ /mV          |     |     |
|-------------------------------------------|-------------|---------------------------|-----|-----|
|                                           |             | $\nu$ /mV·s <sup>-1</sup> |     |     |
| RTIL                                      | at 293 K    | 10                        | 50  | 100 |
| [C <sub>2</sub> mim][NTf <sub>2</sub> ]   | 34          | 283                       | 393 | 505 |
| [C <sub>4</sub> mim][NTf <sub>2</sub> ]   | 52          | 352                       | 606 | 777 |
| [C <sub>6</sub> mim][FAP]                 | 74          | 361                       | 601 | 773 |
| [C <sub>4</sub> mpyrr][NTf <sub>2</sub> ] | 89          | 164                       | 298 | 398 |
| [C <sub>4</sub> mim][BF <sub>4</sub> ]    | 112         | 132                       | 188 | 247 |
| [C <sub>4</sub> mim][PF <sub>6</sub> ]    | 371         | 188                       | 261 | 354 |
| On C-SPE                                  |             |                           |     |     |
| [C <sub>2</sub> mim][NTf <sub>2</sub> ]   | 34          | 242                       | 332 | 422 |
| [C <sub>4</sub> mim][PF <sub>6</sub> ]    | 371         | 142                       | 359 | 557 |

§ Barrosse-Antle, L.E.; Bond, A.M.; Compton, R.G.; O'Mahony, A.M.; Rogers, E.I.; Silvester, D.S. *Chem. Asian J.* 2010, 5, 202-230.

**Table S3.** Peak-to-peak separations ( $\Delta E_p$ ) for the oxygen/superoxide redox couple on the SPGE at scan rates of 10, 50, and 100  $\text{mV}\cdot\text{s}^{-1}$  at 10–100%  $\text{O}_2$  in the six different RTILs used in this study.

| Scan rate: 10 $\text{mV}\cdot\text{s}^{-1}$  | $\Delta E_p/\text{V}$       |          |       |       |       |       |
|----------------------------------------------|-----------------------------|----------|-------|-------|-------|-------|
|                                              | $[\text{O}_2]/\text{vol}\%$ |          |       |       |       |       |
| RTIL                                         | 10                          | 20       | 40    | 60    | 80    | 100   |
| [C <sub>2</sub> mim][NTf <sub>2</sub> ]      | (190)                       | (151)    | (197) | (226) | 257   | 283   |
| [C <sub>4</sub> mim][NTf <sub>2</sub> ]      | (264)                       | 252      | 360   | (329) | (344) | (352) |
| [C <sub>6</sub> mim][FAP]                    |                             | — N.A. — |       |       |       | 601   |
| [C <sub>4</sub> mpyrr][NTf <sub>2</sub> ]    | (105)                       | 98       | 120   | 134   | 154   | 164   |
| [C <sub>4</sub> mim][BF <sub>4</sub> ]       | (151)                       | (159)    | 115   | 117   | 127   | 132   |
| [C <sub>4</sub> mim][PF <sub>6</sub> ]       | (190)                       | 117      | 112   | 127   | 139   | 188   |
| Scan rate: 50 $\text{mV}\cdot\text{s}^{-1}$  |                             |          |       |       |       |       |
| $[\text{O}_2]/\text{vol}\%$                  |                             |          |       |       |       |       |
| RTIL                                         | 10                          | 20       | 40    | 60    | 80    | 100   |
| [C <sub>2</sub> mim][NTf <sub>2</sub> ]      | 137                         | 173      | 229   | 286   | 352   | 393   |
| [C <sub>4</sub> mim][NTf <sub>2</sub> ]      | 264                         | 252      | 360   | 329   | 344   | 352   |
| [C <sub>6</sub> mim][FAP]                    |                             | — N.A. — |       |       |       | 361   |
| [C <sub>4</sub> mpyrr][NTf <sub>2</sub> ]    | 142                         | 154      | 193   | 237   | 278   | 298   |
| [C <sub>4</sub> mim][BF <sub>4</sub> ]       | 117                         | 137      | 142   | 156   | 176   | 188   |
| [C <sub>4</sub> mim][PF <sub>6</sub> ]       | (208)                       | 168      | 176   | 195   | 222   | 261   |
| Scan rate: 100 $\text{mV}\cdot\text{s}^{-1}$ |                             |          |       |       |       |       |
| $[\text{O}_2]/\text{vol}\%$                  |                             |          |       |       |       |       |
| RTIL                                         | 10                          | 20       | 40    | 60    | 80    | 100   |
| [C <sub>2</sub> mim][NTf <sub>2</sub> ]      | 198                         | 222      | 271   | 359   | 430   | 505   |
| [C <sub>4</sub> mim][NTf <sub>2</sub> ]      | 359                         | 486      | 688   | 734   | 793   | 777   |
| [C <sub>6</sub> mim][FAP]                    |                             | — N.A. — |       |       |       | 773   |
| [C <sub>4</sub> mpyrr][NTf <sub>2</sub> ]    | 198                         | 222      | 264   | 325   | 376   | 398   |
| [C <sub>4</sub> mim][BF <sub>4</sub> ]       | 146                         | 173      | 188   | 205   | 227   | 247   |
| [C <sub>4</sub> mim][PF <sub>6</sub> ]       | 283                         | 234      | 247   | 273   | 305   | 354   |

Numbers in brackets ( ) = estimated values, since the peak potentials from CVs were unclear.

**Table S4.** Analytical parameters obtained from calibration graphs from LTCA experiments for the reduction of oxygen in the six RTILs, on both the screen-printed graphite (SPGE) and carbon screen-printed electrode (C-SPE) surfaces. Equations of the linear best fit, limits of detection (LODs), and  $R^2$  values of the calibration plots obtained at the lower (0.1–20%) and higher (1.1–100%)  $O_2$  concentration ranges (see Figure 3 in the main text, and Figures S4, S5, and S6).

| SPE   | RTIL                                      | [O <sub>2</sub> ] range<br>/vol% | Order      | Equation of linear best fit<br>I/A, [O <sub>2</sub> ]/vol%  | LOD<br>/vol% | R <sup>2</sup> |
|-------|-------------------------------------------|----------------------------------|------------|-------------------------------------------------------------|--------------|----------------|
| SPGE  | [C <sub>2</sub> mim][NTf <sub>2</sub> ]   | 0.1–20                           | Descending | $I = 2.07 \times 10^{-7}[\text{O}_2] + 1.02 \times 10^{-7}$ | 1.2          | 0.997          |
|       |                                           |                                  | Ascending  | $I = 2.76 \times 10^{-7}[\text{O}_2] + 2.33 \times 10^{-8}$ | 0.87         | 0.999          |
| C-SPE |                                           |                                  | Descending | $I = 9.55 \times 10^{-7}[\text{O}_2] - 2.72 \times 10^{-7}$ | 13           | 0.663          |
|       |                                           |                                  | Ascending  | $I = 3.86 \times 10^{-7}[\text{O}_2] + 1.16 \times 10^{-5}$ | 11           | 0.809          |
| SPGE  | [C <sub>4</sub> mim][PF <sub>6</sub> ]    | 0.1–20                           | Descending | $I = 4.33 \times 10^{-8}[\text{O}_2] + 1.22 \times 10^{-8}$ | 0.60         | 0.999          |
|       |                                           |                                  | Ascending  | $I = 4.41 \times 10^{-8}[\text{O}_2] + 2.28 \times 10^{-8}$ | 1.1          | 0.998          |
| C-SPE |                                           |                                  | Descending | $I = 5.65 \times 10^{-8}[\text{O}_2] + 1.85 \times 10^{-8}$ | 0.81         | 0.999          |
|       |                                           |                                  | Ascending  | $I = 7.19 \times 10^{-8}[\text{O}_2] + 4.82 \times 10^{-8}$ | 2.5          | 0.992          |
| SPGE  | [C <sub>2</sub> mim][NTf <sub>2</sub> ]   | 1.1–100                          | Ascending  | $I = 2.64 \times 10^{-7}[\text{O}_2] - 1.30 \times 10^{-7}$ | 2.4          | 0.999          |
|       |                                           |                                  | Descending | $I = 2.63 \times 10^{-7}[\text{O}_2] - 3.06 \times 10^{-7}$ | 3.8          | 0.999          |
| C-SPE |                                           |                                  | Ascending  | — N.A. —                                                    |              |                |
|       |                                           |                                  | Descending | — N.A. —                                                    |              |                |
| SPGE  | [C <sub>4</sub> mim][PF <sub>6</sub> ]    | 1.1–100                          | Ascending  | $I = 2.01 \times 10^{-8}[\text{O}_2] + 3.46 \times 10^{-8}$ | 13           | 0.988          |
|       |                                           |                                  | Descending | $I = 1.89 \times 10^{-8}[\text{O}_2] - 4.34 \times 10^{-8}$ | 11           | 0.992          |
| C-SPE |                                           |                                  | Ascending  | $I = 6.30 \times 10^{-8}[\text{O}_2] + 1.87 \times 10^{-7}$ | 7.9          | 0.996          |
|       |                                           |                                  | Descending | $I = 6.45 \times 10^{-8}[\text{O}_2] - 9.40 \times 10^{-8}$ | 11           | 0.992          |
| SPGE  | [C <sub>4</sub> mpyrr][NTf <sub>2</sub> ] | 0.1–20                           | Descending | $I = 4.69 \times 10^{-8}[\text{O}_2] + 1.83 \times 10^{-8}$ | 0.93         | 0.998          |
|       |                                           |                                  | Ascending  | $I = 5.50 \times 10^{-8}[\text{O}_2] + 7.45 \times 10^{-9}$ | 0.27         | 0.999          |
| C-SPE |                                           |                                  | Descending | $I = 6.47 \times 10^{-8}[\text{O}_2] + 3.36 \times 10^{-8}$ | 1.7          | 0.995          |
|       |                                           |                                  | Ascending  | $I = 6.26 \times 10^{-8}[\text{O}_2] + 7.64 \times 10^{-8}$ | 3.5          | 0.984          |

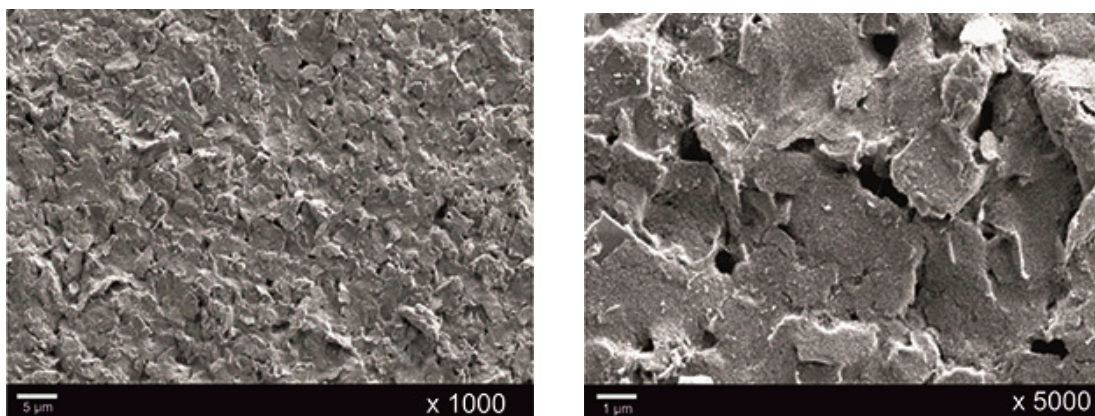

**Figure S1.** Scanning electron microscopy (SEM) images of the home-made SPGE used in this work, at two different magnifications. These electrodes are heterogeneous and are made up of conductive graphite and carbon black particles held together by a polymeric binder. They are relatively rough, but are not porous. These electrodes do have a high proportion of edge plane sites/defects and, hence, that is the reason they give rise to electrochemically useful signatures.

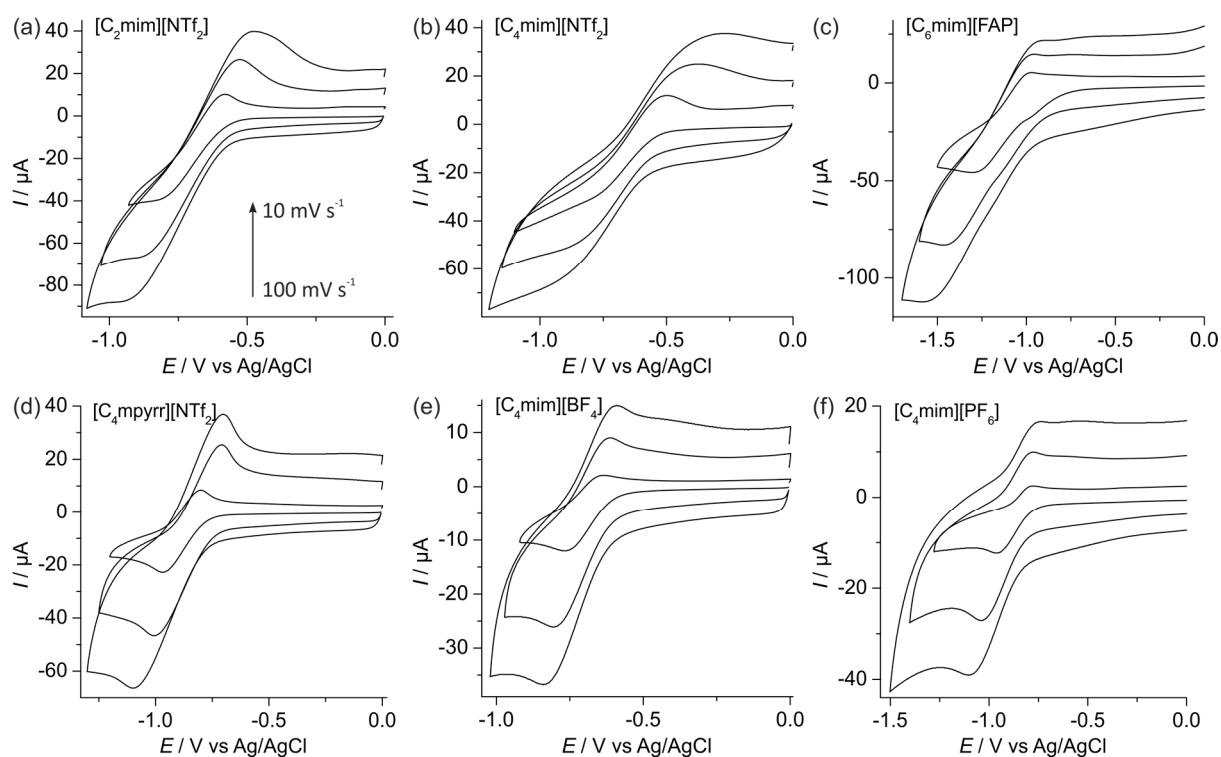

**Figure S2.** CVs at different scan rates (10, 50, and 100  $\text{mV}\cdot\text{s}^{-1}$ ) for the reduction of 100% vol. oxygen on a SPGE in the six RTILs used in this study.

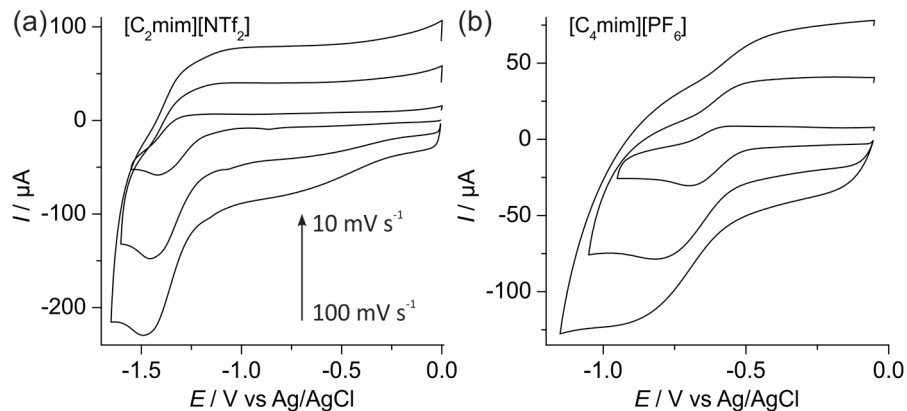

**Figure S3.** CVs at different scan rates (10, 50, and 100  $mV \cdot s^{-1}$ ) on DropSens C-SPEs for 100% vol.  $O_2$  in (a)  $[C_2mim][NTf_2]$  and (b)  $[C_4mim][PF_6]$ .

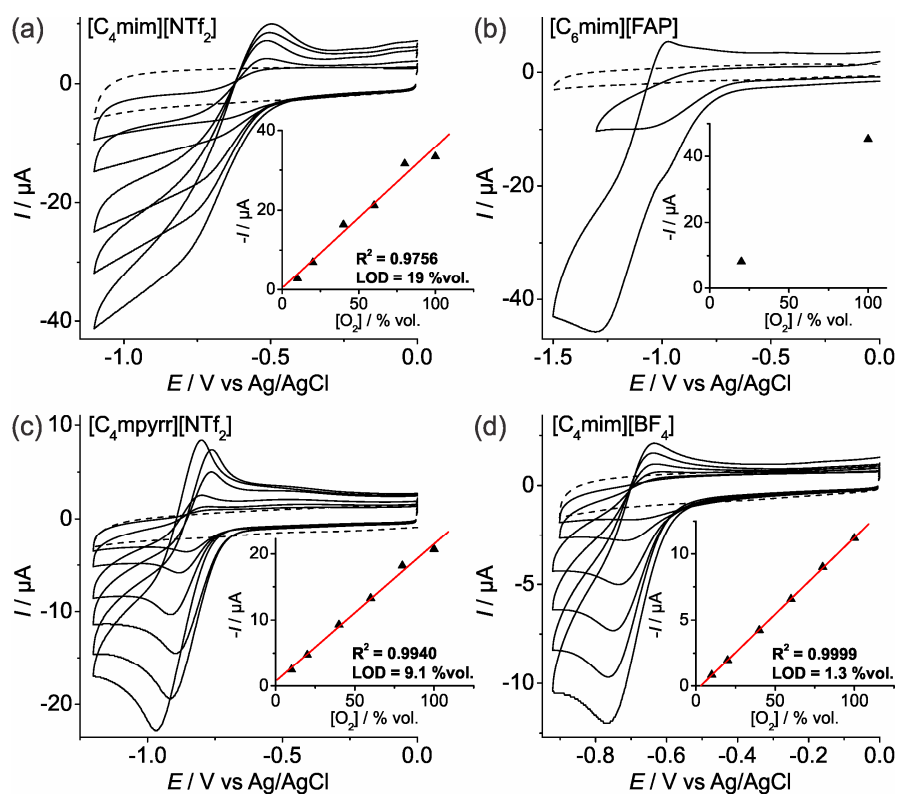

**Figure S4.** CVs at 10  $mV \cdot s^{-1}$  on a SPGE for different concentrations of oxygen (10–100% vol.) in the four other RTILs (not shown in the main text). The inset shows the respective calibration plots with the  $R^2$  and the limit of detection (LOD) values.

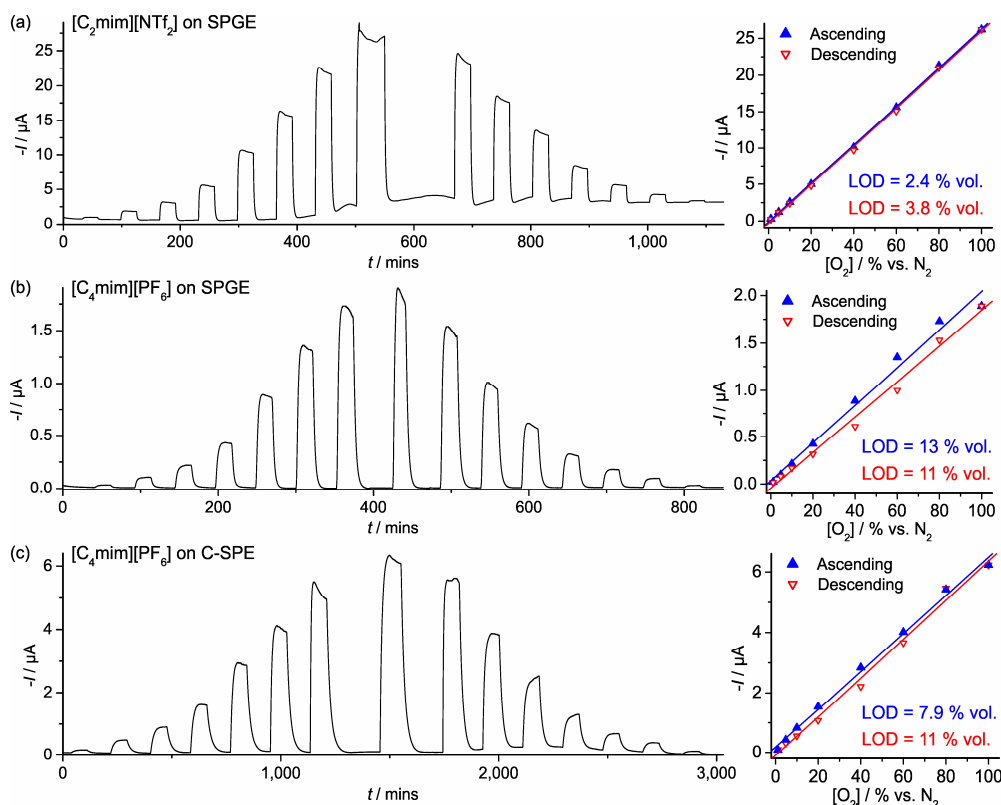

**Figure S5. (Left)** LTCA for different concentrations of oxygen in (a) [C<sub>2</sub>mim][NTf<sub>2</sub>] on a SPGE, (b) [C<sub>4</sub>mim][PF<sub>6</sub>] a SPGE, and (c) [C<sub>4</sub>mim][PF<sub>6</sub>] on a DropSens C-SPE for 1, 5, 10, 20, 40, 60, 80, 100, 80, 60, 40, 20, 10, 5, and 1% vol. O<sub>2</sub> alternating with periods of N<sub>2</sub> purging, performed after running the calibration experiments at the lower (0.1–20% vol. O<sub>2</sub>) concentration range on the same system, conducted at 0.15 to 0.20 V negative to the O<sub>2</sub> reduction peak potentials. LTCA for [C<sub>2</sub>mim][NTf<sub>2</sub>] on DropSens C-SPE were not conducted as the response had deteriorated during experiments at the lower concentration range. **(Right)** Calibration plots for the initial descending and subsequent ascending change in O<sub>2</sub> concentrations.

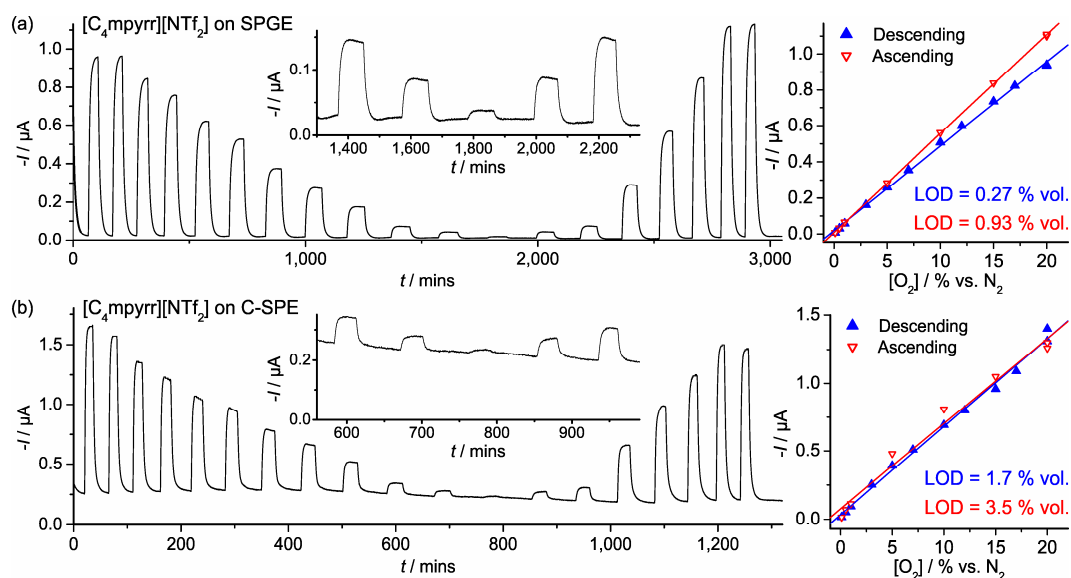

**Figure S6.** LTCA for different concentrations of oxygen in [C<sub>4</sub>mpyr][NTf<sub>2</sub>] on (a) a SPGE and (b) a DropSens C-SPE for 20, 20, 17, 15, 12, 10, 7, 5, 3, 1, 0.5, 0.1, 0.5, 1, 3, 5, 7, 10, 12, 15, 17, 20, and 20% vol. O<sub>2</sub> alternating with periods of N<sub>2</sub> purging, conducted at 0.15 to 0.20 V negative to the O<sub>2</sub> reduction peak potentials. The inset shows a plot zoomed into the lowest concentrations (1, 0.5, 0.1, 0.5, and 1% vol. O<sub>2</sub>). The respective calibration plots for the initial descending and subsequent ascending change in O<sub>2</sub> concentrations are shown on the right.

## S1 Ammonia detection on SPGEs and C-SPEs

### S1.1. Experimental

Ammonia gas ( $\text{NH}_3$ , 500 ppm, nitrogen fill) was purchased from CAC gases. A step potential of 2.5 mV and a scan rate of  $10 \text{ mV}\cdot\text{s}^{-1}$  was used for cyclic voltammetry (CV) experiments. Chronoamperometric transients on the SPEs employed a sampling time of 0.01 s. For ammonia, CV peak currents were not analysed due to the absence of a clear peak. Instead, currents were extracted from short-term and long-term chronoamperometry experiments to form calibration graphs. In all cases, the blank response (0 ppm ammonia) was subtracted from the analyte response. Ca. 15 minutes was typically sufficient to saturate 20/30  $\mu\text{L}$  of the neat RTIL.

For CV and LTCA experiments, a concentration range between 10–100 ppm for  $\text{NH}_3$  was used, with the  $\text{NH}_3$  flow rate varying from 20 to 50 sccm, and the  $\text{N}_2$  flow rate varying from 980 to 20 sccm. Longer experiments were avoided for  $\text{NH}_3$  due to the high cost of the ammonia gas cylinder.

### S1.2. Results and Brief Discussion

Oxidation peaks for ammonia were not obvious (or reproducible) on the SPGE surface (see Figures S7 and S8), suggesting that CV is not a suitable technique for ammonia sensing on these electrodes. For ammonia, LTCA responses (Figures S9 and S10) and PSCA responses (Figures S11 and S12) were not ideal in shape, but produced linear calibration graphs with LODs below the permissible exposure limit. Overall, SPGEs with  $[\text{C}_2\text{mim}][\text{NTf}_2]$  gave the best analytical responses for  $\text{NH}_3$  sensing, but neither electrode material appears to be as suitable for ammonia sensing compared to platinum or gold SPEs (see K. Murugappan, J. Lee and D. S. Silvester, *Electrochem. Commun.*, 2011, **13**, 1435-1438.)

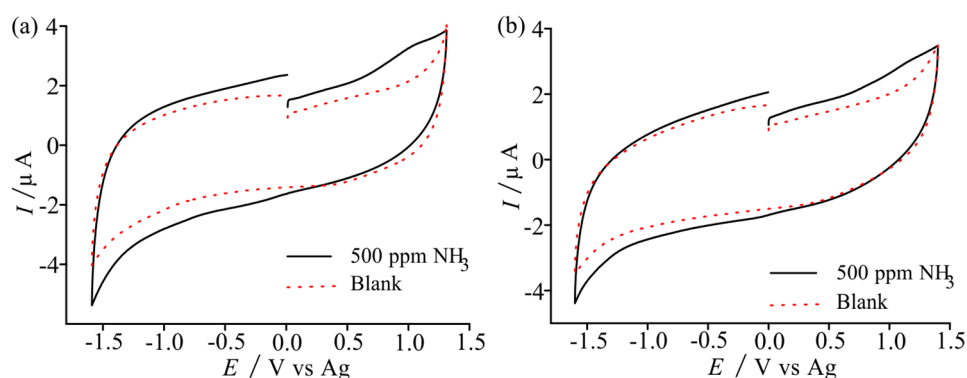

**Figure S7.** CVs at  $10 \text{ mV}\cdot\text{s}^{-1}$  for 500 ppm  $\text{NH}_3$  oxidation in (a)  $[\text{C}_2\text{mim}][\text{NTf}_2]$  and (b)  $[\text{C}_4\text{mim}][\text{PF}_6]$  on a SPGE. Blank CVs (in the absence of ammonia) are shown as red dashed lines.



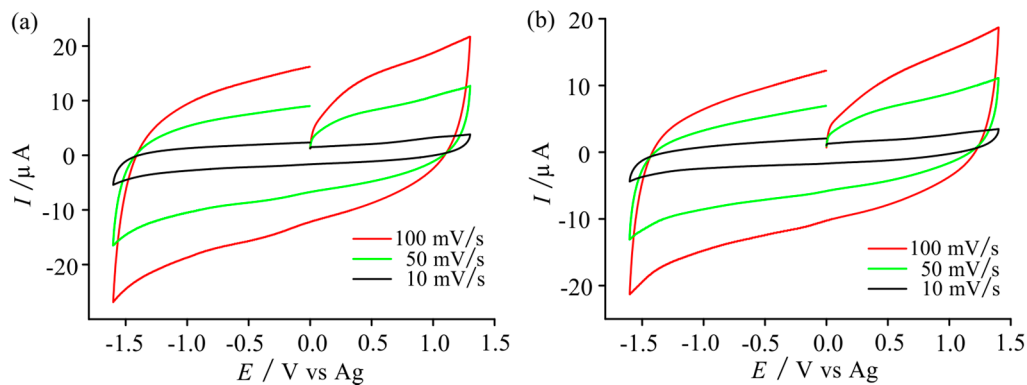

**Figure S8.** CVs at different scan rates (10, 50, and 100  $\text{mV}\cdot\text{s}^{-1}$ ) for 500 ppm  $\text{NH}_3$  in (a)  $[\text{C}_2\text{mim}][\text{NTf}_2]$  and (b)  $[\text{C}_4\text{mim}][\text{PF}_6]$  on a SPGE.

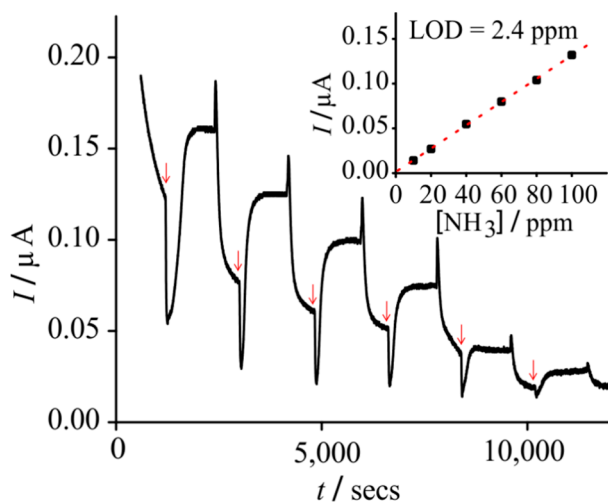

**Figure S9.** LTCA for 10–100 ppm  $\text{NH}_3$ , alternating with periods of nitrogen purging, in  $[\text{C}_2\text{mim}][\text{NTf}_2]$  RTIL on a SPGE. The potential was biased at +1.25 V. Red arrows indicate the addition of ammonia (100, 80, 60, 40, 20, and 10 ppm) into the cell. The inset shows the corresponding calibration plot and LOD value. Currents were measured from the spike to the steady-state (or maximum) current value.

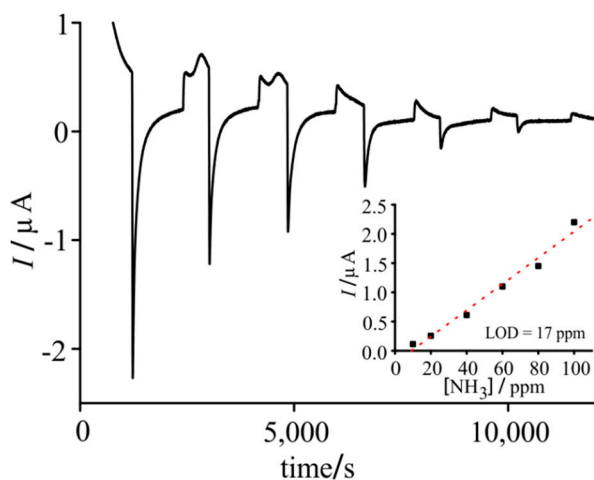

**Figure S10.** LTCA for 10–100 ppm  $\text{NH}_3$  in  $[\text{C}_2\text{mim}][\text{NTf}_2]$  on a DropSens C-SPE. The potential was biased at +1.25 V vs. Ag, and the cell was flushed with nitrogen between each  $\text{NH}_3$  concentration change.

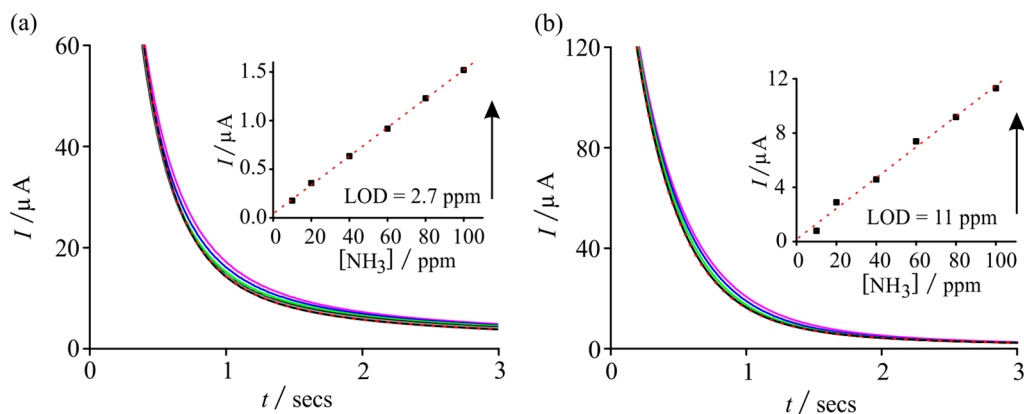

**Figure S11.** PSCA for 10–100 ppm  $\text{NH}_3$  on a SPGE in (a)  $[\text{C}_2\text{mim}][\text{NTf}_2]$  and (b)  $[\text{C}_4\text{mim}][\text{PF}_6]$ . The potential was stepped from 0.0 V to +1.25 V and monitored for 10 seconds, although the first three seconds are shown in the figure for clarity. The blank response in the absence of ammonia is shown as the red dotted line. Currents were measured at a fixed time of 2.0 seconds after the potential step. The insets show the (background subtracted) calibration plots and LOD values.

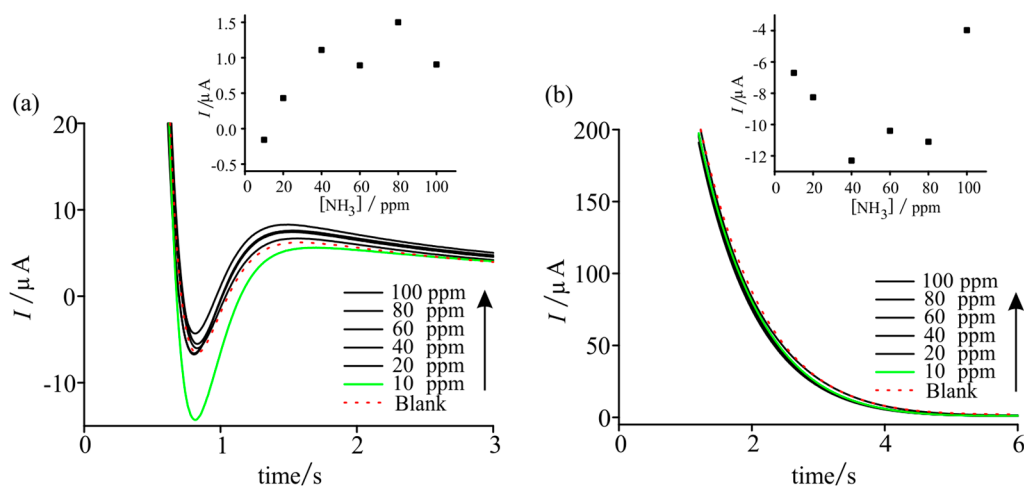

**Figure S12.** PSCA for 10–100 ppm  $\text{NH}_3$  in (a)  $[\text{C}_2\text{mim}][\text{NTf}_2]$  and (b)  $[\text{C}_4\text{mim}][\text{PF}_6]$  RTILs on a DropSens C-SPE. The potential was stepped from 0 V to +1.25 V and measured for 10 seconds (only the first three and six seconds, respectively, are shown in the Figure for clarity). Currents for the calibration graphs were measured at 2 s.
